# Supplementary material
Source: MDPI journal article supplement (https://www.mdpi.com/2071-1050/14/11/6646)
Supplement: s1 [file s1]

Supplementary materials for

**Influence of source apportionment of PAHs occurrence in  
aquatic suspended particulate matter at a typical post-  
industrial city: A case study of Freiburger Mulde River**

Zhuotao Qiu<sup>a</sup>, Zhenyu Wang<sup>b</sup>, Jie Xu<sup>c</sup>, Yi Liu<sup>c</sup>, Jin Zhang<sup>d, e, \*</sup>

<sup>a</sup> Department of Ecology and Institute of Hydrobiology, Jinan University, 510632  
Guangzhou, China

<sup>b</sup> Institute of Urban and Industrial Water Management, Technische Universität Dresden,  
01062 Dresden, Germany

<sup>c</sup> Safety, Environment and Technology Supervision Research Institute, PetroChina Southwest  
Oil and Gas Field Company, 610041 Chengdu, China

<sup>d</sup> State Key Laboratory of Desert and Oasis Ecology, Xinjiang Institute of Ecology and  
Geography, Chinese Academy of Sciences, 830011 Urumqi, China

<sup>e</sup> Yangtze Institute for Conservation and Development, State Key Laboratory of  
Hydrology-Water Resources and Hydraulic Engineering, Hohai University, 210098 Nanjing,  
China

\*Corresponding author:

zhangjin@ms.xjb.ac.cn;

jin.zhang@hhu.edu.cn

## **Content**

**Section S1.** Sample analysis

**Section S2.** Mann-Kendall trend test

**Section S3.** Wavelet analysis

**Table S1.** The sampling information for stations

**Table S2.** Proposed toxicity equivalency factors (TEFs) for individual PAHs

**Table S3.** Global review of PAHs concentrations

**Table S4.** The correlation coefficient ( $R^2$ ) values between observed and predicted concentrations of the PMF model

**Table S5.** The results of Displacement (DISP) and Bootstrap (BS) by PMF model

**Table S6.** Effects range-low (ERL), effects range-median (ERM), mean and maximum concentration of 16 PAHs in  $\mu\text{g kg}^{-1}$

**Table S7.** Hazard quotients (HQ) and mean hazard quotient (MHQ) of 16 PAHs from 2002-2016

**Table S8.** TEQ values of PAHs at different locations

## Section S1. Sample analysis

The water samples were collected from 2002 to 2016 at 6 measuring stations in the Freiburger Mulde River. It should be noted that some stations in the midstream (such as Dobeln) were only used for several years. The main sampling frequency is 4 times a year, and the sampling time is relatively evenly distributed in each season. The sample sizes for the different sites (Katzenstein, Hilbersdorf, Halsbrücke, Siebenlehn, Dobeln, and Erlin) were 10, 49, 23, 51, 20, and 54, respectively. Variances in sampling periods are the main reason for the differences in the number of samples at different stations. As one of the important tributaries of the Elbe, the Freiburger Mulde River's sample set is affected by changes in the Elbe monitoring program (<http://www.fgg-elbe.de>). **Table S1** provides details of the spatiotemporal distribution of the samplings.

All the sample detections were conducted by the state operating company for environment and agriculture (BfUL, Staatliche Betriebsgesellschaft für Umwelt und Landwirtschaft). Details on sample collection and quality control are available on the online website of the office of the FGG Elbe (<https://www.fgg-elbe.de>). Sample collection and chemical analysis would be briefly described here. Water samples were collected by a stainless-steel centrifugal pump, in which coarse particles larger than 1 mm in diameter were excluded. The suspension was separated using a flow-through centrifuge (15,000 rpm). Suspended solids retention was higher than 80% in most samples. After centrifugation, the suspension was collected in glass containers and stored sealed at -20°C before being transported to the laboratory for analysis. Suspension samples were extracted on a modified SUPREX SFE 50 extraction unit

using an acetone/n-hexane (1:1) solvent mixture. A sample amount of approximately 0.5 g of the suspended matter was mixed with 200 mg of activated copper powder and statically extracted in a 10 mL extraction cell at a temperature of 100 °C and a pressure of 150 atm for 15 min. The extracted material was rinsed with 20 mL of mixed solvent, and the remaining solvent was blown out of the extraction cell with nitrogen. Dynamic extraction is then performed using ultrasound. Water was extracted and the n-hexane phase was dried over sodium sulfate. After concentration to 100 µL, the suspended solid extract was pre-washed using HPLC.

Quantification in the extracts was carried out on a GC (Hewlett Packard 5890 Series II) with a mass selective detector (MSD 5971 A) and KAS 3 cold application system (Gerstel GmbH, Mühlheim). A 5% phenylmethyl silicone capillary column with 0.25 µm ID, 0.5 µm film thickness, and 25 m length (SE 52, Macherey/Nagel, Dülmen) was used, with helium being used as the carrier gas. The GC temperature program was: 40 °C initial temperature, 5 °C/min to 310 °C, 310 °C for 20 min. Parameters for the cold feed system were: 40 °C initial temperature; 1 °C/s to 70 °C; 70 °C for 20 s; 12 °C/s to 320 °C; 320 °C for 600 s; splitless time 120 s; Injection volume 2 µL (suspended matter extracts). The uncertainty of sample detection is within acceptable limits [32].

## Section S2. Mann-Kendall trend test

Mann-Kendall (MK) trend test was used for the long-term trend analysis of trace elements in sediments [89,90]. MK trend test is a nonparametric rank-based method, thus, the effect of outliers in data on the trend results could be ignored [91]. The statistic  $S$  of the MK test which represented the trend value of the series is determined by:

$$S = \sum_{i=1}^{n-1} \sum_{j=i+1}^n \text{sign}(x_j - x_i) = \begin{cases} 1 & x_i < x_j \\ 0 & x_i = x_j \\ -1 & x_i > x_j \end{cases} \quad \text{Eq. S1}$$

where  $n$  is the number of samples;  $x_i$  and  $x_j$  are the time series data in chronological order. The mean of  $S$  is zero in the null hypothesis, and the variance  $V(S)$  should be constant, which is calculated by Equation 2:

$$V(S) = \left[ n(n-1)(2n+5) - \sum_i^P t_i(t_i-1)(2t_i+5) \right] / 18 \quad \text{Eq. S2}$$

where  $P$  is the number of tied groups;  $t_i$  is the value of the  $i_{th}$  group; the standardized test statistics  $Z$  can be calculated by Eq. 3 ( $P > 40$ ):

$$Z = \begin{cases} \frac{S-1}{\sqrt{V(S)}} & \text{if } S > 0 \\ 0 & \text{if } S = 0 \\ \frac{S+1}{\sqrt{V(S)}} & \text{if } S < 0 \end{cases} \quad \text{Eq. S3}$$

where  $|Z|$  is higher than the determined significance level (0.05), the null hypothesis (no trend) should be rejected.

### Section S3. Wavelet analysis

Wavelet analysis is a useful technique for figuring out various time scales or changes in the variance of time series data [45]. For a long-term data set, the wavelet function could accurately extract the local characteristics of the data and obtain the periodic change characteristics of the pollutants at a specific scale [1,92–94]. Suppose that  $\psi(t)$  is a square-integrable function in the real number domain, the basic wavelet function satisfies [94]:

$$\int_{-\infty}^{+\infty} \psi(t) dt = 0 \quad \text{Eq. S4}$$

where  $\psi(t)$  is the mother wavelet. The sub-wavelets are obtained through the translation and expansion of the mother wavelet:

$$\psi_{a,b}(x) = |a|^{\frac{1}{2}} \psi(at - b) \quad \text{Eq. S5}$$

where  $a$  is the scaling factor,  $b$  is the translation factor. Wavelet transform is divided into discrete wavelet transform and continuous wavelet transform. The continuous wavelet transform which was more applicable in the extraction time sequence data signal characteristics was used in this study [92].

Furthermore, the variation of the wavelet coefficient can be used to determine the time scale of the specific period of the time series signal [94]. The equation is shown as follows:

$$Var(a) = \int_{-\infty}^{+\infty} |W_x(a, f)|^2 df \quad \text{Eq. S6}$$

where  $a$  represents the scale factor of the periodicity of the original data series at various time scales. The peak value of  $Var(a)$  represents the main time scale (primary period) of the series. All the calculation and analysis processes were carried out in MATLAB and Suffer.

**Table S1** The sampling information for stations

| <b>Station</b> | <b>Period (year)</b>           | <b>Number of samples</b> |
|----------------|--------------------------------|--------------------------|
| Katzenstein    | 2002, 2008, 2010, 2015         | 10                       |
| Hilbersdorf    | 2004-2009, 2011, 2013-<br>2015 | 49                       |
| Halsbrucke     | 2002-2006, 2008-2009,<br>2013  | 23                       |
| Siebenlehn     | 2003-2010, 2015-2016           | 51                       |
| Dobeln         | 2006-2007, 2009, 2013,<br>2016 | 20                       |
| Erlin          | 2002-2016                      | 54                       |



**Table S2.** Proposed toxicity equivalency factors (TEFs) for individual PAHs

| Individual PAH         | TEF from USEPA (1984) | TEF from Nisbet and Lagoy (1992) |
|------------------------|-----------------------|----------------------------------|
| Naphthalene            | 0                     | 0.001                            |
| Acenaphthylene         | 0                     | 0.001                            |
| Acenaphthene           | 0                     | 0.001                            |
| Fluorene               | 0                     | 0.001                            |
| Phenanthrene           | 0                     | 0.001                            |
| Anthracene             | 0                     | 0.01                             |
| Fluoranthene           | 0                     | 0.001                            |
| Pyrene                 | 0                     | 0.001                            |
| Benz(a)anthracene      | 1                     | 0.1                              |
| Chrysene               | 1                     | 0.01                             |
| Benzo(b)fluoranthene   | 1                     | 0.1                              |
| Benzo(k)fluoranthene   | 1                     | 0.1                              |
| Benzo(a)pyrene         | 1                     | 1                                |
| Dibenzo(a,h)anthracene | 1                     | 1                                |
| Indeno(1,2,3-cd)pyrene | 1                     | 0.1                              |
| Benzo(g,h,i)perylene   | 0                     | 0.01                             |

**Table S3.** Global review of PAHs concentrations

| <b>Location</b>                                     | <b>n<sup>a</sup></b> | <b>Σ PAHs<br/>(µg kg<sup>-1</sup><br/>dry<br/>weight)</b> | <b>Pollution level</b> | <b>References</b> |
|-----------------------------------------------------|----------------------|-----------------------------------------------------------|------------------------|-------------------|
| <b>Taranto Gulf, Italy</b>                          | 8                    | 335-5193                                                  | Moderate to very high  | [57]              |
| <b>Xiamen Harbor, China</b>                         | 9                    | 2900-61000                                                | High to very high      | [53]              |
| <b>Victoria Harbor, Hong Kong</b>                   | 9                    | 1200-14000                                                | High to very high      | [53]              |
| <b>Commercial ports from Spain</b>                  | 12                   | 260-66710                                                 | Moderate to very high  | [95]              |
| <b>Gemlik Bay, Turkey</b>                           | 14                   | 50.8-13482                                                | Low to very high       | [96]              |
| <b>Boston Harbor, USA</b>                           | 16                   | 7300-358000                                               | Very high              | [59]              |
| <b>Olbia Harbor, Italy</b>                          | 16                   | 160-770                                                   | Moderate               | [97]              |
| <b>Genoa-Voltri Harbor, Italy</b>                   | 16                   | 4500-20800                                                | High to very high      | [98]              |
| <b>Norwegian Harbor, Norway</b>                     | 16                   | 2000-76000                                                | High to very high      | [60]              |
| <b>Santander Bay, Northern Spain</b>                | 16                   | 20-25800                                                  | Low to very high       | [99]              |
| <b>Kaohsiung Harbor, Taiwan</b>                     | 17                   | 472-16207                                                 | Moderate to very high  | [54]              |
| <b>Izmit Bay, Turkey</b>                            | 17                   | 2500-25000                                                | High to very high      | [100]             |
| <b>Western Harbor, Alexandria, Egypt</b>            | 20                   | 8-131150                                                  | Low to very high       | [61]              |
| <b>Baltimore Harbor, USA</b>                        | 21                   | 2944-29590                                                | High to very high      | [101]             |
| <b>Incheon Harbor, Korea</b>                        | 23                   | 12-1400                                                   | Low to moderate        | [58]              |
| <b>Hsin-ta Harbor, Taiwan</b>                       | 30                   | 1156-3382                                                 | high                   | [102]             |
| <b>The River Tiber basion, Italy</b>                | 6                    | 1663.1-15472.9                                            | High to very high      | [103]             |
| <b>Pearl River estuary and coastal areas, China</b> | 15                   | 515.4-16489                                               | Moderate to very high  | [55]              |
| <b>Henan Reach of Yellow River, Middle China</b>    | 16                   | 506.6-10510                                               | Moderate to very high  | [56]              |
| <b>Hun River, Dalian River watershed, China</b>     | 18                   | 375.48-2310.07                                            | Moderate to high       | [23]              |

|                                                   |    |                 |                       |            |
|---------------------------------------------------|----|-----------------|-----------------------|------------|
| <b>Taizi River, Dalian River watershed, China</b> | 18 | 317.5-238518.7  | Moderate to very high | [23]       |
| <b>Dalian River, China</b>                        | 18 | 655.34-10477.19 | Moderate to very high | [23]       |
| <b>Langat River, Peninsular Malaysia</b>          | 18 | 308-7970        | Moderate to very high | [104]      |
| <b>Barcelona, France</b>                          | 16 | 47.9-4210       | Low to high           | [105]      |
| <b>Banyuls-sur-Mer, France</b>                    | 16 | 117-2514        | Moderate to high      | [105]      |
| <b>Seine River and Estuary, France</b>            | 25 | 1000-14000      | High to very high     | [106]      |
| <b>York River, VA Estuary, USA</b>                | 20 | 199-1153        | Moderate to high      | [107]      |
| <b>Elbe river, Sachsen, Germany</b>               | 16 | 5994-9566       | Very high             | [83]       |
| <b>Freiberger Mulde river, Sachsen, Germany</b>   | 16 | 3147-8162       | High to very high     | This study |

---

<sup>a</sup>: the number of selected PAHs

**Table S4.** The correlation coefficient ( $R^2$ ) values between observed and predicted concentrations of the PMF model

| Species | $R^2$     |           |           |
|---------|-----------|-----------|-----------|
|         | 2002-2006 | 2007-2011 | 2012-2016 |
| NAP     | 0.9       | 0.8       | 1.0       |
| ACY     | 0.7       | 0.9       | 0.8       |
| ACE     | 0.8       | 0.8       | 0.9       |
| FLU     | 0.4       | 0.7       | 1.0       |
| PHE     | 0.9       | 0.9       | 1.0       |
| ANT     | 0.7       | 0.8       | 1.0       |
| FLUH    | 0.8       | 0.7       | 1.0       |
| PYR     | 0.9       | 0.8       | 1.0       |
| BaA     | 0.9       | 0.9       | 0.9       |
| CHR     | 0.9       | 0.9       | 1.0       |
| BbF     | 0.9       | 0.8       | 1.0       |
| BkF     | 0.8       | 0.9       | 1.0       |
| BaP     | 0.9       | 0.8       | 1.0       |
| DBA     | 0.9       | 0.9       | 0.6       |
| IDP     | 0.9       | 0.8       | 1.0       |
| BgP     | 0.9       | 0.9       | 1.0       |

Notes:  $R^2$ : The correlation coefficient values between observed and predicted concentrations of individual PAHs.

**Table S5.** The results of Displacement (DISP) and Bootstrap (BS) by PMF model

| Period    |                         | Coke oven | Gasoline | Diesel |
|-----------|-------------------------|-----------|----------|--------|
| 2002–2006 | BS mapping (%)          | 88        | 100      | 96     |
|           | Drop of Q (%) in DISP   |           | -0.003   |        |
|           | Swaps by factor in DISP | 0         | 0        | 0      |
| 2007–2011 | BS mapping (%)          | 100       | 94       | 100    |
|           | Drop of Q (%) in DISP   |           | -0.002   |        |
|           | Swaps by factor in DISP | 0         | 0        | 0      |
| 2012–2016 | BS mapping (%)          | 93        | 100      | 98     |
|           | Drop of Q (%) in DISP   |           | -0.006   |        |
|           | Swaps by factor in DISP | 0         | 0        | 0      |

**Table S6.** Effects range-low (ERL), effects range-median (ERM), mean and maximumconcentration of 16 PAHs in  $\mu\text{g kg}^{-1}$ 

| <b>PAHs</b>                                | <b>ERL</b> | <b>ERM</b> | <b>Mean</b> | <b>Maximum</b> |
|--------------------------------------------|------------|------------|-------------|----------------|
| <b>NAP</b>                                 | 160.0      | 2100.0     | 101.0       | 820.0          |
| <b>ACY</b>                                 | 44.0       | 640.0      | 39.0        | 110.0          |
| <b>ACE</b>                                 | 16.0       | 500.0      | 36.0        | 140.0          |
| <b>FLU</b>                                 | 19.0       | 540.0      | 70.0        | 470.0          |
| <b>PHE</b>                                 | 240.0      | 1500.0     | 590.0       | 2000.0         |
| <b>ANT</b>                                 | 853.0      | 1100.0     | 170.0       | 1300.0         |
| <b>FLUH</b>                                | 600.0      | 5100.0     | 1028.0      | 2400.0         |
| <b>PYR</b>                                 | 665.0      | 2600.0     | 822.0       | 1600.0         |
| <b>CHR</b>                                 | 384.0      | 2800.0     | 474.0       | 1600.0         |
| <b>BaA</b>                                 | 261.0      | 1600.0     | 461.0       | 1300.0         |
| <b>BbF</b>                                 | n.a.       | n.a.       | 442.0       | 1100.0         |
| <b>BkF</b>                                 | n.a.       | n.a.       | 349.0       | 1100.0         |
| <b>BaP</b>                                 | 430.0      | 1600.0     | 428.0       | 270.0          |
| <b>DBA</b>                                 | 63.4       | 260.0      | 84.0        | 1100.0         |
| <b>IDP</b>                                 | n.a.       | n.a.       | 375.0       | 760.0          |
| <b>BgP</b>                                 | n.a.       | n.a.       | 301.0       | 1100.0         |
| <b><math>\Sigma_{16}\text{PAHs}</math></b> | 4000.0     | 44792.0    | 5770.0      | 17170.0        |

n.a.: not available

**Table S7.** Hazard quotients (HQ) and mean hazard quotient (MHQ) of 16 PAHs from 2002-2016

| PAHs                   | Ring Number | HQ          |             |            |            |        |       |
|------------------------|-------------|-------------|-------------|------------|------------|--------|-------|
|                        |             | Katzenstein | Hilbersdorf | Halsbrücke | Siebenlehn | Dobeln | Erlbn |
| NAP                    | 2           | 0.02        | 0.08        | 0.05       | 0.04       | 0.02   | 0.04  |
| ACY                    | 3           | 0.03        | 0.10        | 0.07       | 0.05       | 0.03   | 0.04  |
| ACE                    | 3           | 0.04        | 0.11        | 0.07       | 0.07       | 0.04   | 0.05  |
| FLU                    | 3           | 0.04        | 0.25        | 0.10       | 0.11       | 0.04   | 0.09  |
| PHE                    | 3           | 0.22        | 0.65        | 0.45       | 0.39       | 0.17   | 0.26  |
| ANT                    | 3           | 0.08        | 0.26        | 0.16       | 0.17       | 0.07   | 0.09  |
| FLUH                   | 4           | 0.14        | 0.29        | 0.26       | 0.22       | 0.11   | 0.12  |
| PYR                    | 4           | 0.23        | 0.48        | 0.39       | 0.33       | 0.17   | 0.19  |
| CHR                    | 4           | 0.15        | 0.22        | 0.22       | 0.18       | 0.09   | 0.12  |
| BaA                    | 5           | 0.25        | 0.38        | 0.36       | 0.31       | 0.16   | 0.21  |
| BbF                    | 5           | n.a.        | n.a.        | n.a.       | n.a.       | n.a.   | n.a.  |
| BkF                    | 5           | n.a.        | n.a.        | n.a.       | n.a.       | n.a.   | n.a.  |
| BaP                    | 6           | 0.26        | 0.34        | 0.34       | 0.28       | 0.16   | 0.19  |
| DBA                    | 5           | 0.51        | 0.44        | 0.39       | 0.33       | 0.17   | 0.21  |
| IDP                    | 5           | n.a.        | n.a.        | n.a.       | n.a.       | n.a.   | n.a.  |
| BgP                    | 6           | n.a.        | n.a.        | n.a.       | n.a.       | n.a.   | n.a.  |
| $\Sigma 16\text{PAHs}$ | /           | 0.10        | 0.18        | 0.16       | 0.14       | 0.07   | 0.09  |
| MHQ                    | /           | 0.16        | 0.30        | 0.24       | 0.20       | 0.10   | 0.13  |

n.a.: not available

**Table S8.** TEQ values of PAHs at different locations

| <b>Location</b>                           | <b>TEQ<br/>(ng TEQ g<sup>-1</sup> dry weight)</b> | <b>Reference</b> |
|-------------------------------------------|---------------------------------------------------|------------------|
| <b>External area</b>                      | 2-1629                                            | [108]            |
| <b>Eastern area</b>                       | 2-1973                                            | [108]            |
| <b>Industrial area</b>                    | 4-4723                                            | [108]            |
| <b>Commerical area</b>                    | 6-4528                                            | [108]            |
| <b>Touristic area</b>                     | 10-2250                                           | [108]            |
| <b>Shipping area</b>                      | 45-3578                                           | [108]            |
| <b>Guba Pechenga</b>                      | 18-300                                            | [108]            |
| <b>Korsfjord</b>                          | 18-60                                             | [108]            |
| <b>Jarfjord</b>                           | 19-35                                             | [108]            |
| <b>Vard Harbor</b>                        | 40-66                                             | [108]            |
| <b>Vars Harbor</b>                        | 472-733                                           | [108]            |
| <b>Kola Bay</b>                           | 71-583                                            | [108]            |
| <b>Kaohsiung Harbor, Taiwan</b>           | 55-1964                                           | [54]             |
| <b>Meiliang Bay, China</b>                | 94-845                                            | [109]            |
| <b>Elbe river, Sachsen, Germany</b>       | 872-1123                                          | [83]             |
| <b>Eastern Mediterranean Sea, Lebanon</b> | 17-872                                            | [110]            |
| <b>Freiberger Mulde river, Germany</b>    | 407-1180                                          | This study       |
